# Supplementary material
Source: PubMed Central journal article supplement (PMC5167573)
Supplement: NIHMS824161-supplement-Graphical_Abstract.pdf [file NIHMS824161-supplement-Graphical_Abstract.pdf]

| Initial Coagulation Stimulus                        | Thrombin Generation Assay                                                                                         | in silico Thrombin Generation Under Flow                                                                          |
|-----------------------------------------------------|-------------------------------------------------------------------------------------------------------------------|-------------------------------------------------------------------------------------------------------------------|
| <p>↓ Tissue Factor<br/>OR<br/>↓ Exogenous FXIa</p>  | <p>Thrombin</p>  <p>time</p>  | <p>Thrombin</p>  <p>time</p>  |
| <p>↓ Tissue Factor<br/>AND<br/>↓ Exogenous FXIa</p> | <p>Thrombin</p>  <p>time</p> | <p>Thrombin</p>  <p>time</p> |
